# Supplementary material for: Untargeted Metabolomics Identifies Biomarkers for MCADD Neonates in Dried Blood Spots
Source: MDPI journal article supplement (doi:10.3390/ijms24119657), 2023-06-02
Supplement: s1 [file s1]

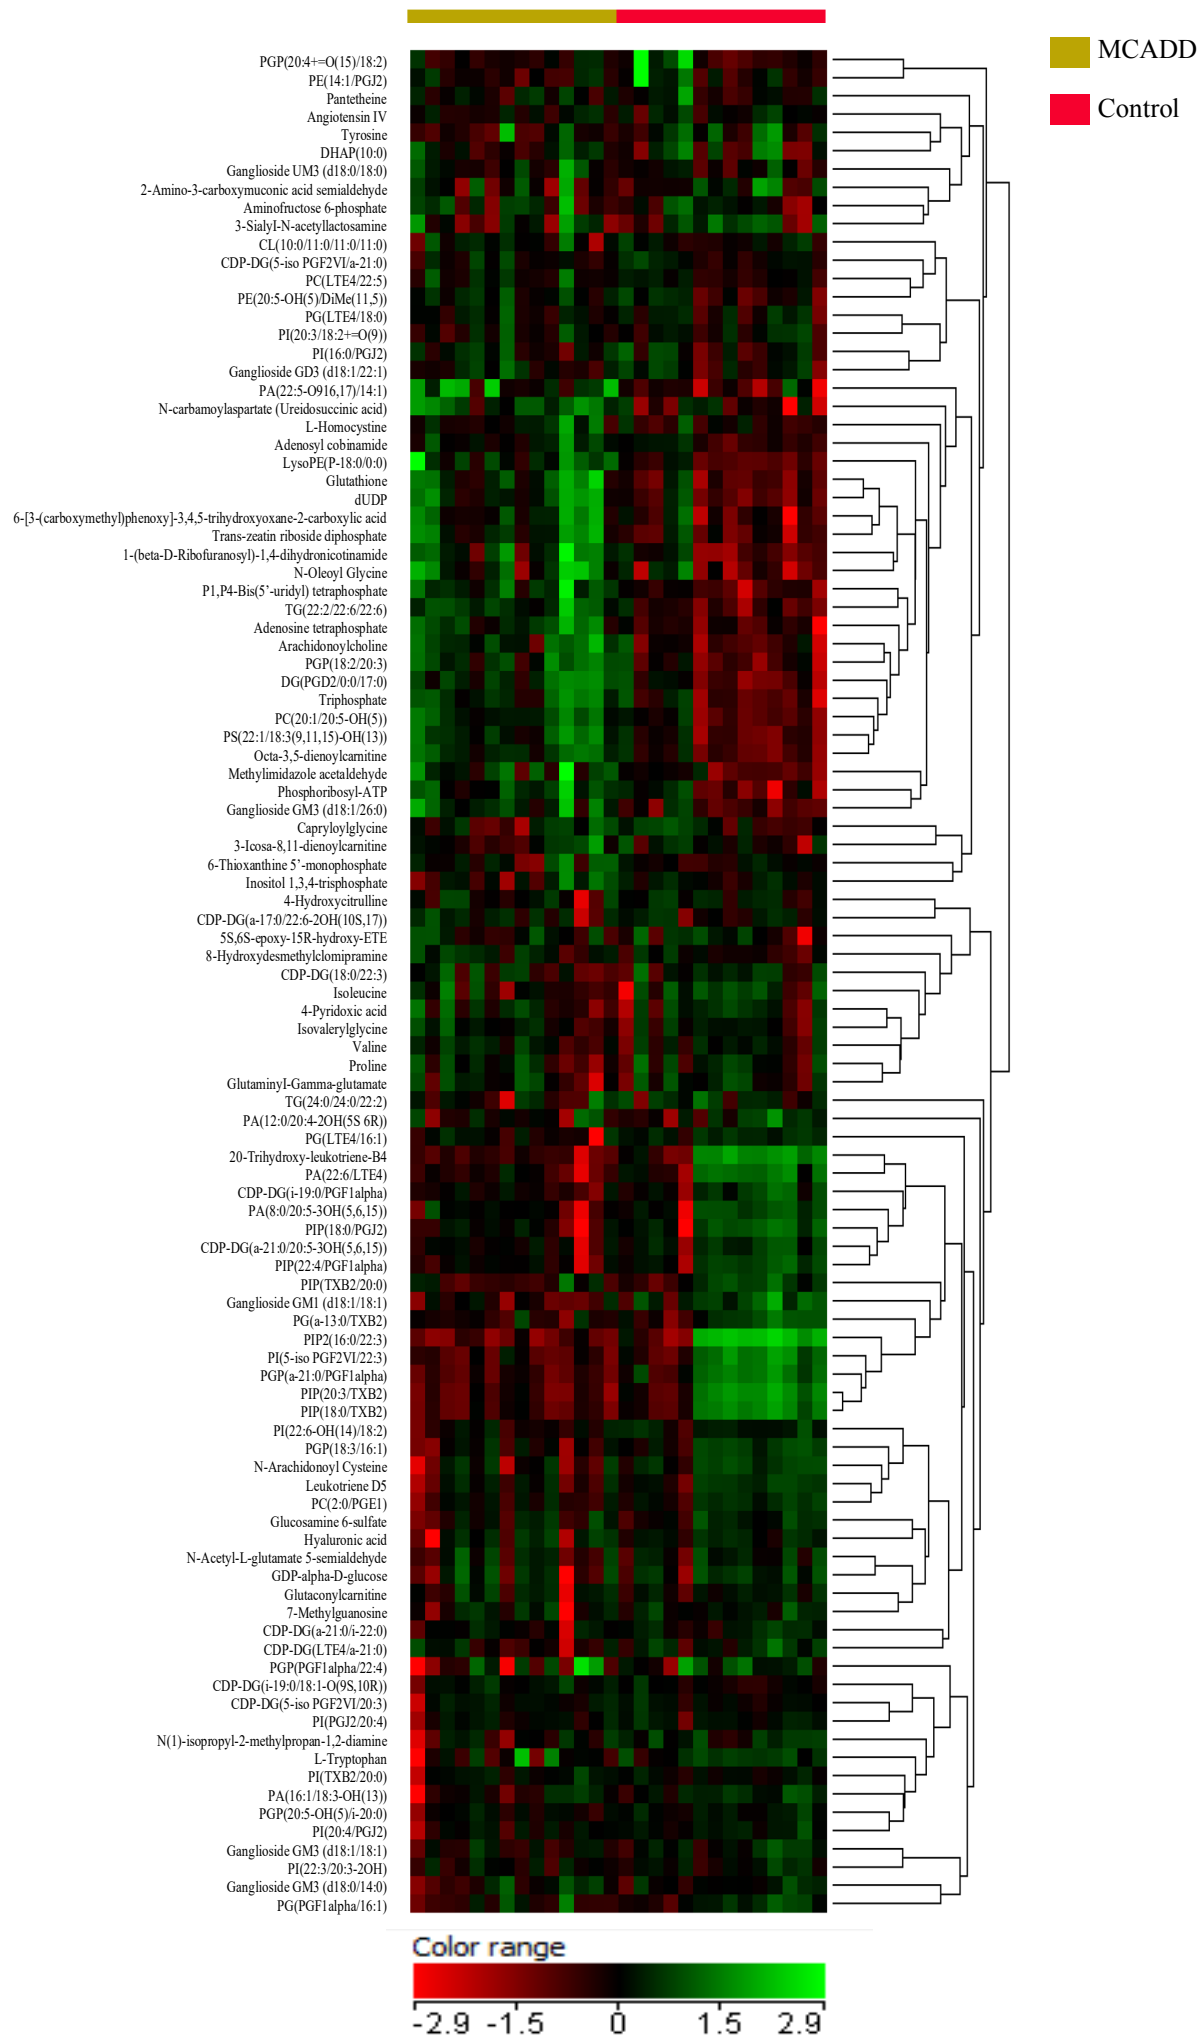

**Figure S1:** Heatmap showing the expression levels of 107 dysregulated metabolites in MCADD newborns compared with healthy controls. Red indicates downregulated metabolites, and green indicates upregulated metabolites.
